# Supplementary material for: Base-free chemoselective transfer hydrogenation of nitroarenes to anilines with formic acid as hydrogen source by a reusable heterogeneous Pd/ZrP catalyst
Source: Royal Society of Chemistry journal article supplement (doi:10.1039/c4ra06174h), 2014-08-11
Supplement: c4ra06174h1.pdf [file c4ra06174h1.pdf]

## Electronic Supplementary Information

# **Base-free Chemoselective Transfer Hydrogenation of Nitroarenes to Anilines with Formic Acid as Hydrogen Source by Reusable Heterogeneous Pd/ZrP Catalyst**

Jaya Tuteja, Shun Nishimura and Kohki Ebitani\*

School of Materials Science, Japan Advanced Institute of Science and Technology,  
1-1 Asahidai, Nomi, Ishikawa 923-1292, Japan.

\*E-mail: ebitani@jaist.ac.jp

**Table S1.** Parameters for Kinetic study of *p*-substituted nitroarenes.<sup>a</sup>

| <b>Substrate</b>               | <b>Initial Rate/<br/>(min<sup>-1</sup>)<sup>b</sup></b> | <b>log (initial rate)</b> |
|--------------------------------|---------------------------------------------------------|---------------------------|
| Nitrobenzene                   | 0.01250                                                 | -1.90                     |
| <i>p</i> -chloronitrobenzene   | 0.00560                                                 | -2.25                     |
| <i>p</i> -nitromethylbenzoate  | 0.00545                                                 | -2.26                     |
| <i>p</i> -nitrobenzeneonitrile | 0.00196                                                 | -2.71                     |

<sup>a</sup>*Reaction Conditions:* Substrate (1 mmol), 2.1wt% Pd/ZrP (20 mg), FA (3 mmol), Ethanol (5 mL), 313 K, 30 min.

<sup>b</sup>Initial rates of the each reaction were determined on the concentration of reactants as a function of time by GC.

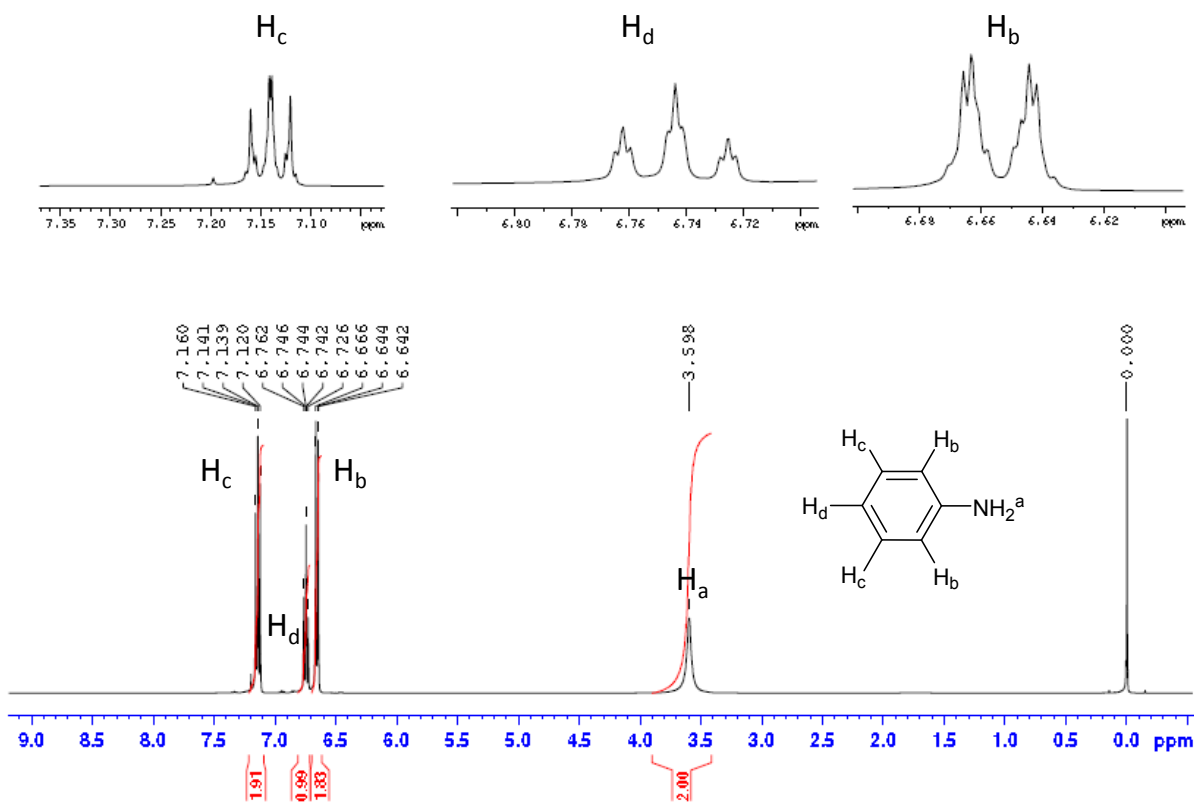

Fig. S1.  $^1\text{H-NMR}$  of the isolated aniline.

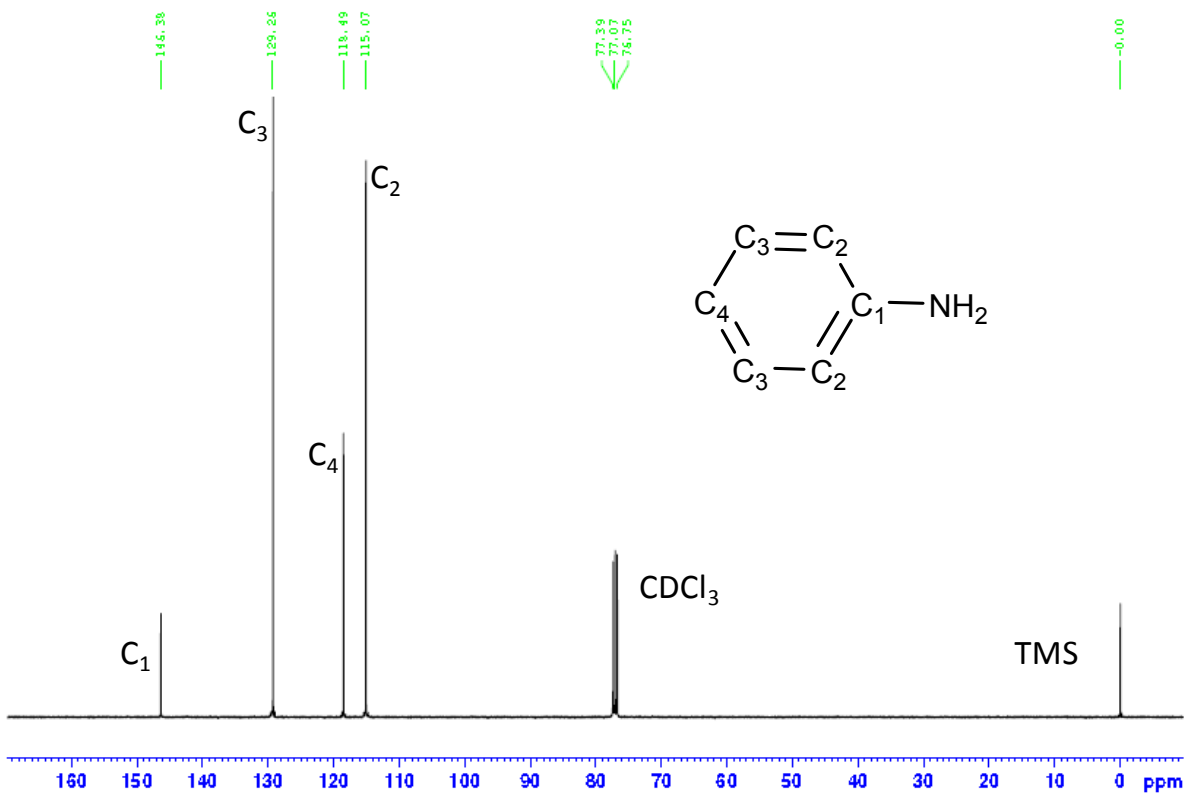

Fig. S2.  $^{13}\text{C-NMR}$  of the isolated aniline.

a) 2.1wt% Pd/ZSM-5

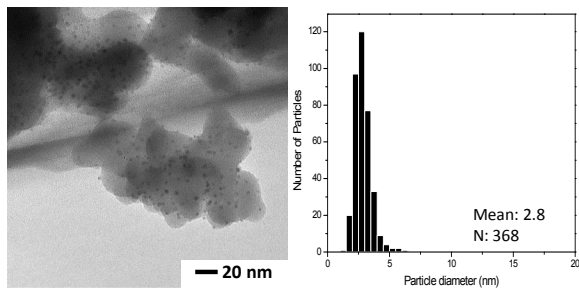

b) 2.1wt% Pd/HY zeolite

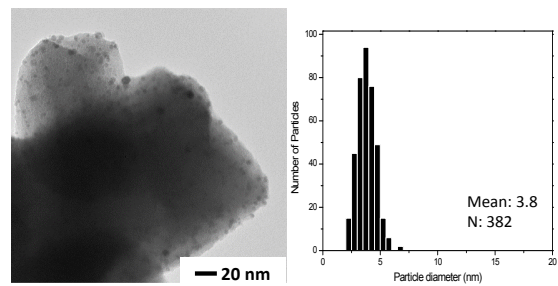

c) 2.1wt% Pd/Nb<sub>2</sub>O<sub>5</sub>

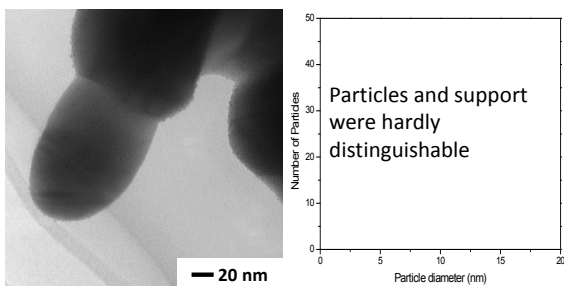

d) 2.1wt% Pd/ $\gamma$ -Al<sub>2</sub>O<sub>3</sub>

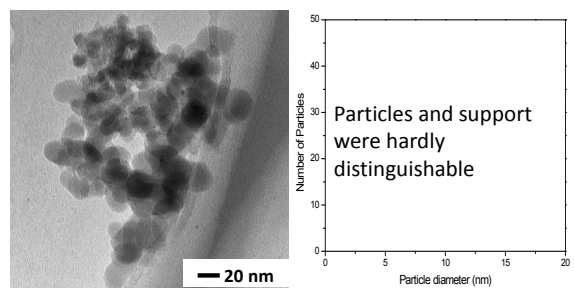

e) 2.1wt% Pd/SiO<sub>2</sub>-Al<sub>2</sub>O<sub>3</sub>

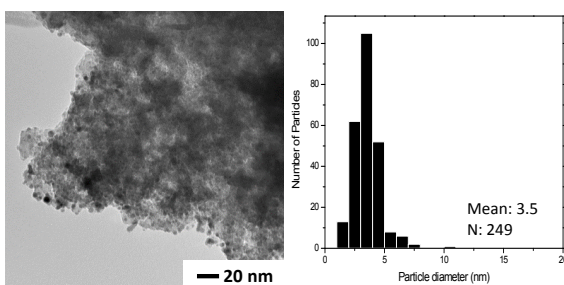

f) 2.1wt% Pd/SO<sub>4</sub><sup>2-</sup>/ZrO<sub>2</sub>

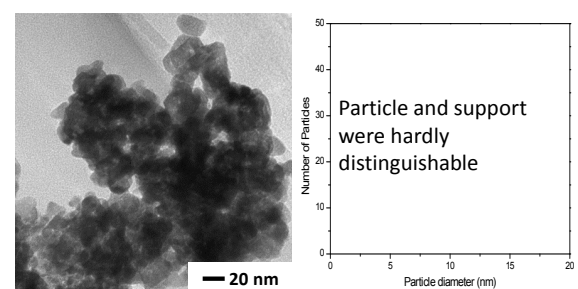

**Fig. S3.** TEM images and particle size distribution of the supported Pd catalysts.
